# Supplementary material
Source: HighWire-hosted journal article supplement (https://bmjopen.bmj.com/content/12/7/e055551)
Supplement: inline-supplementary-material-1 [file inline-supplementary-material-1.pdf]

## Supplementary material - Full list of Adverse reactions by drug class

| Drug Class                                      | Number of associated ADRs | Medications implicated                                                                                                              | Adverse reaction                                                                                                |
|-------------------------------------------------|---------------------------|-------------------------------------------------------------------------------------------------------------------------------------|-----------------------------------------------------------------------------------------------------------------|
| <b>Diuretics</b>                                | 31                        | Furosemide (13), Spironolactone (8), Bumetanide (6), Bendroflumethiazide (2), Coamilofruse (1), Indapamide (1)                      | Renal impairment (18), Electrolyte derrangement (12), Postural hypotension (1)                                  |
| <b>Steroid inhaler</b>                          | 27                        | Steroid inhaler (27)                                                                                                                | CAP (26), Oral Thrush (1)                                                                                       |
| <b>Anticoagulants</b>                           | 21                        | Warfarin (7), Apixaban (5), Edoxaban (4), Rivaroxaban (4), Enoxaparin (1)                                                           | Minor bleeding (10), Anaemia (4), Intracranial haemmhorage (4), GI bleed (3)                                    |
| <b>Proton Pump Inhibitor</b>                    | 18                        | Lansoprazole (9), Omeprazole (6), Pantoprazole (3)                                                                                  | Hypomagnasaemia (11), Hyponatraemia (6), C.Diff (1)                                                             |
| <b>Antiplatelets</b>                            | 16                        | Aspirin (13), Clopidogrel (3)                                                                                                       | Intracranial haemorrhage (5), GI bleed (4), Minor bleeding (4), Anaemia                                         |
| <b>Chemotherapy</b>                             | 16                        | Chemotherapy (16)                                                                                                                   | Neutropenic Sepsis (8), Sepsis (4), Constipation (1), Derranged electrolytes (1), Rash (1), Thromocytopenia (1) |
| <b>ACE-I <sup>(1)</sup> /ARB <sup>(2)</sup></b> | 14                        | Losartan (4), Ramipril (4), Irbesartan (3), Candesartan (1), Lisinopril (1), Perindopril (1)                                        | Renal impairment (9), Postural hypotension (3), Hyperkalaemia (1), Renal failure (1)                            |
| <b>Antidepressants &amp; antipsychotics</b>     | 13                        | Mirtazapine (2), Sertraline (2), Sulpride (2), Carbamazepine (1), Dosulepin (1), Nortriptyline (1), Olanzapine (1), Risperidone (1) | Confusion (3), Hyponatraemia (3), Parkinsonism (3), Constipation (1), GI bleed (1), Prolonged QTc (1)           |
| <b>Opiates</b>                                  | 13                        | Codeine (5), Morphine Sulphate (3), Oxycodone (2), Tramadol (2), Buprenorphine (1)                                                  | Constipation (6), Confusion (4), Respiratory Depression (2), Hallucinations (1)                                 |
| <b>Beta adrenoceptor blockers</b>               | 9                         | Bisoprolol (6), Atenolol (1), Nebivolol (1), Propranolol (1)                                                                        | Bradycardia (5), Postural hypotension (4)                                                                       |
| <b>Insulin</b>                                  | 7                         | Insulin (7)                                                                                                                         | Hypoglycaemia (4), Hypoglycaemic seizures (2)                                                                   |
| <b>Calcium Channel Blocker</b>                  | 6                         | Amlodipine (4), Ivabradine (1), Diltiazem (1)                                                                                       | Postural hypotension (5), Prolonged QTc (1)                                                                     |
| <b>Bladder anticholinergics</b>                 | 6                         | Solifenacin (4), Tolterodine (1), Tropsium (1)                                                                                      | Confusion (4), Constipation (2)                                                                                 |
| <b>Immunosuppressants</b>                       | 5                         | MMF (3), Tacrolimus (2)                                                                                                             | Sepsis (5)                                                                                                      |
| <b>Antimicrobials</b>                           | 4                         | Penicillin (2), Aciclovir (1), Azithromicin (1)                                                                                     | Angioedema (1), Rash (1), Renal impairment (1), Prolonged QTc (1)                                               |

|                                    |   |                                                     |                                                                   |
|------------------------------------|---|-----------------------------------------------------|-------------------------------------------------------------------|
| <b>Oral anti diabetics</b>         | 4 | Gliclazide (2), Empagliflozin (1), Pioglitazone (1) | Hypoglycaemia (2), Heart Failure (1), Urinary Tract infection (1) |
| <b>Monoclonals</b>                 | 3 | Afatanib (1), Pembrolizumab (1), Ruxolitinib (1)    | Liver toxicity (1), Pneumonitis (1), Sepsis (1)                   |
| <b>Statins</b>                     | 2 | Atorvastatin (1), Simvastatin (1)                   | Myopathy (2)                                                      |
| <b>Levodopa</b>                    | 2 | Co-beneldopa (1), Co-careldopa (1)                  | Postural Hypotension (2)                                          |
| <b>PTH<sup>(3)</sup> analogues</b> | 2 | Alfacalcidol (1), Calcitriol (1)                    | Hypercalcaemia (2)                                                |
| <b>NSAIDs<sup>(4)</sup></b>        | 2 | Naproxen (2)                                        | ACS (1), GI Bleed (1)                                             |
| <b>Benzodiazepines</b>             | 2 | Lorazepam (1), Tempazepam (1)                       | Confusion (2)                                                     |
| <b>Baclofen</b>                    | 1 | Baclofen (1)                                        | Constipation (1)                                                  |
| <b>Amitriptyline</b>               | 1 | Amitriptyline (1)                                   | Confusion (1)                                                     |
| <b>Leviteracitem</b>               | 1 | Leviteracitem (1)                                   | Renal impairment (1)                                              |
| <b>Doxazocin</b>                   | 1 | Doxazocin (1)                                       | Postural hypotension (1)                                          |
| <b>Nefopam</b>                     | 1 | Nefopam (1)                                         | Delirium (1)                                                      |
| <b>Quinine</b>                     | 1 | Quinine (1)                                         | Prolonged QTc (1)                                                 |
| <b>Lithium</b>                     | 1 | Lithium (1)                                         | Lithium Toxicity (1)                                              |
| <b>Laxatives</b>                   | 1 | Laxatives (1)                                       | Diarrhoea (1)                                                     |
| <b>Bisphosphonates</b>             | 1 | Alendronic Acid (1)                                 | Erosive Gastritis (1)                                             |
| <b>Thyroxine</b>                   | 1 | Levothyroxine (1)                                   | Tachyarrhythmia (1)                                               |
| <b>Zopiclone</b>                   | 1 | Zopiclone (1)                                       | Confusion (1)                                                     |
| <b>Phosphodiesterase inhibitor</b> | 1 | Uniphyllin (1)                                      | Nausea (1)                                                        |

(1) Angiotensin converting enzyme inhibitor (2) Angiotensin receptor blocker (3) Parathyroid hormone (4) Non steroidal anti inflammatory
